# Supplementary material
Source: PubMed Central journal article supplement (PMC3951943)
Supplement: mmc1.pdf [file mmc1.pdf]

## **Gene-centric Meta-analysis in 87,736 Individuals of European Ancestry Identifies Multiple Blood-Pressure-Related Loci**

Vinicius Tragante, Michael R. Barnes, Santhi K. Ganesh, Matthew B. Lanktree, Wei Guo, Nora Franceschini, Erin N. Smith, Toby Johnson, Michael V. Holmes, Sandosh Padmanabhan, Konrad J. Karczewski, Berta Almoguera, John Barnard, Jens Baumert, Yen-Pei Christy Chang, Clara C. Elbers, Martin Farrall, Mary E. Fischer, Tom R. Gaunt, Johannes M.I.H. Gho, Christian Gieger, Anuj Goel, Yan Gong, Aaron Isaacs, Marcus E. Kleber, Irene Mateo Leach, Caitrin W. McDonough, Matthijs F.L. Meijis, Olle Melander, Christopher P. Nelson, Iija M. Nolte, Nathan Pankratz, Tom S. Price, Jonathan Shaffer, Sonia Shah, Maciej Tomaszewski, Peter J. van der Most, Erik P.A. Van Iperen, Judith M. Vonk, Kate Witkowska, Caroline O.L. Wong, Li Zhang, Amber L. Beitelshes, Gerald S. Berenson, Deepak L. Bhatt, Morris Brown, Amber Burt, Rhonda M. Cooper-DeHoff, John M. Connell, Karen J. Cruickshanks, Sean P. Curtis, George Davey-Smith, Christian Delles, Ron T. Gansevoort, Xiuqing Guo, Shen Haiqing, Claire E. Hastie, Marten H. Hofker, G. Kees Hovingh, Daniel S. Kim, Susan A. Kirkland, Barbara E. Klein, Ronald Klein, Yun R. Li, Steffi Maiwald, Christopher Newton-Cheh, Eoin T. O'Brien, N. Charlotte Onland-Moret, Walter Palmas, Afshin Parsa, Brenda W. Penninx, Mary Pettinger, Vasani S. Ramachandran, Jane E. Ranchalis, Paul M. Ridker, Lynda M. Rose, Peter Sever, Daichi Shimbo, Laura Steele, Ronald P. Stolk, Barbara Thorand, Mieke D. Trip, Cornelia M. van Duijn, W. Monique Verschuren, Cisca Wijmenga, Sharon Wyatt, J. Hunter Young, Aeilko H. Zwinderman, Connie R. Bezzina, Eric Boerwinkle, Juan P. Casas, Mark J. Caulfield, Aravinda Chakravarti, Daniel I. Chasman, Karina W. Davidson, Pieter A. Doevendans, Anna F. Dominiczak, Garret A. FitzGerald, John G. Gums, Myriam Fornage, Hakon Hakonarson, Indrani Halder, Hans L. Hillege, Thomas Illig, Gail P. Jarvik, Julie A. Johnson, John J.P. Kastelein, Wolfgang Koenig, Meena Kumari, Winfried März, Sarah S. Murray, Jeffery R. O'Connell, Albertine J. Oldehinkel, James S. Pankow, Daniel J. Rader, Susan Redline, Muredach P. Reilly, Eric E. Schadt, Kandice Kottke-Marchant, Harold Snieder, Michael Snyder, Alice V. Stanton, Martin D. Tobin, André G. Uitterlinden, Pim van der Harst, Yvonne T. van der Schouw, Nilesh J. Samani, Hugh Watkins, Andrew D.

**Johnson, Alex P. Reiner, Xiaofeng Zhu, Paul I.W. de Bakker, Daniel Levy, Folkert W. Asselbergs, Patricia B. Munroe, and Brendan J. Keating**

## **ACKNOWLEDGMENTS**

### Discovery Cohort Acknowledgements

AIBIII: The Allied Irish Bank workers III: study was supported by the Higher Education Authority (Ireland), Programme for research in Third-Level Institutions Cycle 3, Programme for Human Genomics. We thank the Allied Irish Bank and their employees for facilitating the study.

AMC-PAS: Funding for PAS was provided by Ipse Movet; Bloodomics (LSHM-CT-2004-503485).

Amish: The Amish studies were supported by NIH research grants R01 HL088119, R01 AG18728, and U01 HL72515, an American Heart Association Scientist Development Grant (0830146N to HS), with additional funding provided by the Mid-Atlantic Nutrition Obesity Research Center (P30 DK072488).

ARIC: The Atherosclerosis Risk in Communities Study is carried out as a collaborative study supported by National Heart, Lung, and Blood Institute contracts (HHSN268201100005C, HHSN268201100006C, HHSN268201100007C, HHSN268201100008C, HSN268201100009C, HHSN268201100010C, HHSN268201100011C, and HHSN268201100012C), R01HL087641, R01HL59367 and R01HL086694; National Human Genome Research Institute contract U01HG004402; and National Institutes of Health contract HHSN268200625226C. Atherosclerotic Risk in Communities: University of North Carolina at Chapel Hill (N01-HC-55015, N01-HC-55018), Baylor Medical College (N01-HC-55016), University of

Mississippi Medical Center(N01-HC-55021), University of Minnesota (N01-HC-55019), Johns Hopkins University (N01-HC-55020), University of Texas, Houston (N01-HC-55022). The authors thank the staff and participants of the ARIC study for their important contributions. Infrastructure was partly supported by Grant Number UL1RR025005, a component of the National Institutes of Health and NIH Roadmap for Medical Research.

ASCOT: This work was supported by Pfizer, New York, NY, USA, for the ASCOT study and the collection of the ASCOT DNA repository; by Servier Research Group, Paris, France; and by Leo Laboratories, Copenhagen, Denmark. We thank all ASCOT trial participants, physicians, nurses, and practices in the participating countries for their important contribution to the study. In particular we thank Clare Muckian and David Toomey for their help in DNA extraction, storage, and handling.

BHS: ENS and SSM are supported in part by NIH/NCRR Grant Number UL1 RR025774. The BHS was supported by grants HD-061437 and HD-062783 from the National Institute of Child Health and Human Development, and AG-16592 from the National Institute on Aging.

BOSS, EHLS, BDES: The Beaver Dam Offspring (BOSS) was supported by R01AG021917 (KJC) from the National Institute on Aging, National Eye Institute, and National Institute on Deafness and Other Communication Disorders, the Epidemiology of Hearing Loss Study (EHLS) was supported by R37AG11099 (KJC) from the National Institute on Aging, and the Beaver Dam Eye Study (BDES) was supported by U10EY06594 (Klein R and Klein BEK) from the National Eye Institute.

The content is solely the responsibility of the authors and does not necessarily reflect the official views of the National Institute on Aging or the National Institutes of Health.

BRIGHT: The HumanCVD BeadChip genotyping for the AIBIII, ASCOT, BRIGHT, MDC and NORDIL cohorts was supported by the British Heart Foundation (grant number PG/07/131/24254 to P.B.M.). The BRIGHT study is also supported by the Medical Research Council of Great Britain (grant number G9521010D); and by the British Heart Foundation (grant number PG/02/128). A.F.D. was supported by the British Heart Foundation (grant numbers RG/07/005/23633, SP/08/005/25115); and by the European Union Ingenious HyperCare Consortium: Integrated Genomics, Clinical Research, and Care in Hypertension (grant number LSHM-C7-2006-037093). The BRIGHT study is extremely grateful to all the patients who participated in the study and the BRIGHT nursing team. We would also like to thank the Barts Genome Centre staff for their assistance with this project. This work forms part of the research themes contributing to the translational research portfolio for Barts and the London Cardiovascular Biomedical Research Unit, which is supported and funded by the National Institute for Health Research.

BWHHS: The British Women's Heart and Health Study is supported by funding from the British Heart Foundation and the Department of Health Policy Research Programme (England). We thank the BWHHS data collection team, General Practitioners who helped with recruitment of participants and the participants. We thank all of the participants and the general practitioners, research nurses and data management staff who supported data collection and preparation. The BWHHS is

coordinated by Shah Ebrahim (PI), Debbie Lawlor and Juan-Pablo Casas, with genotyping funded by the BHF (PG/07/131/24254, PI Tom Gaunt).

CARDIA: Coronary Artery Risk in Young Adults: University of Alabama at Birmingham (N01-HC-48047, N01-HC-95095), University of Minnesota (N01-HC-48048), Northwestern University (N01-HC-48049), Kaiser Foundation Research Institute (N01-HC-48050), Tufts-New England Medical Center (N01-HC-45204), Wake Forest University (N01-HC-45205), Harbor-UCLA Research and Education Institute (N01-HC-05187), University of California, Irvine (N01-HC-45134, N01-HC-95100)

CARe: Candidate-Gene Association Resource: We thank the National Heart, Lung, and Blood Institute and the research institutions, study investigators, and field staff for their support in creating the CARe program for biomedical research. The European Ancestry studies ARIC, CARDIA, CFS, CHS, MESA and FHS are listed by study below. We also thank the study participants, without whom this endeavor would not have been possible. DNA samples were genotyped through the Broad Institute (N01-HC-65226).

CARDIA: The Coronary Artery Risk Development in Young Adults was funded by contracts N01-HC-95095, N01-HC-48047, N01-HC-48048, N01-HC-48049, N01-HC-48050, N01-HC-45134, N01-HC-05187, N01-HC-45205, and N01-HC-45204 from the National Heart, Lung and Blood Institute to the CARDIA investigators. A full list of principal CARDIA investigators and institutions can be found at

<http://www.cardia.dopm.uab.edu/study-information/participating-institutions>.

CCCS: CCCS was supported by grant P50HL81011 from the National Heart, Lung and Blood Institute, National Institutes of Health, U.S. Department of Health and Human Services. The authors thank the CHARISMA Investigators for phenotype and sample collection.

CFS: Cleveland Family Study was supported by funding from the National Heart, Lung and Blood Institute, National Institutes of Health, U.S. Department of Health and Human Services, and Case Western Reserve University (R01-HL-46380, R01-HL-113338, R01-M01-RR-00080).

CHS: Cardiovascular Health Study: This research was supported by contracts HHSN268201200036C, HHSN268200800007C, N01 HC55222, N01HC85079, N01HC85080, N01HC85081, N01HC85082, N01HC85083, N01HC85086, and grant HL080295 from the National Heart, Lung, and Blood Institute (NHLBI), with additional contribution from the National Institute of Neurological Disorders and Stroke (NINDS). Additional support was provided by AG023629 from the National Institute on Aging (NIA). A full list of principal CHS investigators and institutions can be found at CHS-NHLBI.org.

CLEAR: CLEAR support (GPJ) came from R01 HL67406, the Northwest Institute of Genetic Medicine, and the State of Washington Life Sciences Discovery Fund. The CLEAR investigators sincerely thank the participants for their efforts.

EPIC-NL: The EPIC-NL study was funded by 'Europe against Cancer' Programme of the European Commission (SANCO), Dutch Ministry of Public Health, Welfare and Sports (VWS), Netherlands Cancer Registry (NKR), LK Research Funds, Dutch Prevention Funds, Dutch Cancer Society; ZonMW the Netherlands Organisation for Health Research and Development, World Cancer Research Fund (WCRF) (The Netherlands). Genotyping of the IBC-chip was funded by IOP Genomics grant IGE05012 from NL Agency.

FHS: The Framingham Heart Study research included in this study is funded by NIH grant/contract N01-HC-25195, R01-HL-092577, R01-HL-076784, R01-AG-028321, and by the NIH Intramural Research Program.

INVEST: INVEST genetic substudy was funded by NIH grants HL074730, HL69758, HL077113, GM074492 and RR017568, a grant from Abbott Pharmaceuticals and the Florida Opportunity Fund and NIH/NCRR clinical and Translational Science Award (CTSA) to University of Florida UL1 RR029890. The INternational VErapamil SR Trandolapril Study (INVEST) and Pharmacogenomics Evaluation of Antihypertensive Responses (PEAR) studies thank the participants and the investigators that made this collection possible.

LURIC: LURIC: LURIC thanks their participants and researchers and acknowledges that it has received funding through the 6th Framework Program (integrated project Bloodomics, grant LSHM-CT-2004-503485) and 7th of Framework Program (Atheroremo, Grant Agreement number 201668 and RiskyCAD, grant agreement number 305739) of the European Union.



MEDAL: MEDAL was supported by Merck & Co (Whitehouse Station, NJ, USA). The authors thank Amarjot Kaur and the current or former employees of Merck Research Laboratories who contributed to the conduct and analysis of the MEDAL data.

MESA (Multi-Ethnic Study of Atherosclerosis): MESA is conducted and supported by the National Heart, Lung, and Blood Institute (NHLBI) in collaboration with MESA investigators. Support for MESA is provided by contracts N01-HC-95159 through N01-HC-95169 and CTSA UL1-RR-024156. Funding for genotyping was provided by NHLBI Contract N02-HL-6-4278 and N01-HC-65226

MONICA/KORA: The MONICA/KORA Augsburg studies were financed by the Helmholtz Zentrum München, German Research Center for Environmental Health, Neuherberg, Germany and supported by grants from the German Federal Ministry of Education and Research (BMBF). Part of this work was financed by the German National Genome Research Network (NGFNplus, project number 01GS0834), by the German Research Foundation (TH-784/2-1 and TH-784/2-2), by the European Foundation for the Study of Diabetes and through additional funds from the Helmholtz Zentrum München, the German Diabetes Center and the University of Ulm. Furthermore, the research was supported within the Munich Center of Health Sciences (MC Health) as part of the Ludwig Maximilians University (LMU) innovative.

MDC: This work was supported by the Swedish Medical Research Council; by the Swedish Heart and Lung Foundation; by the Medical Faculty of Lund University, Malmo University Hospital; by the Albert Pahlsson Research Foundation; by the

Crafoord foundation; by the Ernhold Lundstroms Research Foundation, the Region Skane; by the Hulda and Conrad Mossfelt Foundation; by the King Gustaf V and Queen Victoria Foundation; by the Lennart Hanssons Memorial Fund; and by the Marianne and Marcus Wallenberg Foundation.

NBS: This work was supported by the Wellcome Trust (grant number 076113/C/04/Z); by the National Institute for Health Research (grant number RP-PG-0310-1002) programme grant to NHSBT, and a National Institute for Health Research grant to the Cambridge Comprehensive Biomedical Research Centre; and by the British Heart Foundation (grant number PG/07/132/24256) for HumanCVD BeadChip genotyping for the UKBS-CC cohort. We acknowledge use of DNA from the United Kingdom Blood Services collection of Common Controls (UKBS-CC collection), funded by the Wellcome Trust and by the National Institute for Health Research. The collection was established as part of the Wellcome Trust Case Control Consortium (WTCCC 2007).

NSHS95: Nova Scotia Health Survey 1995 (NSHS95) was supported by grants by HL-091099, HL-080665, HL-076857, HL-084034, HL-088117, HL-07854, and HL-072866 from the NHLBI; by the National Health and Welfare of Canada, Ottawa, Ontario; by the Nova Scotia Department of Health, Halifax; and by the Heart and Stroke Foundation of New Brunswick, Saint John

PEAR:PEAR was supported by the National Institute of Health Pharmacogenetics Research Network grant U01-GM074492 and the National Center for Advancing Translational Sciences under the award number UL1 TR000064 (University of

Florida); UL1 TR000454 (Emory University) and UL1 TR000135 (Mayo Clinic). PEAR was also supported by funds from the Mayo Foundation.

PennCAC: The University of Pennsylvania Coronary Artery Calcification Study (PennCAC) gratefully acknowledge internal funding from the University of Pennsylvania and the participation of the study subject and are indebted to the investigators on these teams.

PennCath: The University of Pennsylvania Catheterization study program (PennCATH) gratefully acknowledge internal funding from the University of Pennsylvania and the participation of the study subject and are indebted to the investigators on these teams.

PROCARDIS: This work was supported by the British Heart Foundation; by the European Community Sixth Framework Programme (grant number LSHM-CT-2007-037273); and by AstraZeneca. AB. R.C., M.F. is supported by the British Heart Foundation Centre for Research Excellence.

SMART: The study leaders are supported by a clinical fellowship from the Netherlands Organisation for Health Research and Development (ZonMw grant 90700342) and by EUGeneHeart, grant number LSHM-CT-2005-018833. The authors acknowledge all MR technicians, research nurses and medical students involved in SMART Heart for valuable support.

WHI: The Women's Health Initiative (WHI) program is funded by the National Heart, Lung, and Blood Institute, National Institutes of Health, U.S. Department of Health and Human Services through contracts HHSN268201100046C, HHSN268201100001C, HHSN268201100002C, HHSN268201100003C, HHSN268201100004C, and HHSN271201100004C.

GRAPHIC: This work was supported by the British Heart Foundation (grant numbers RG/2001004, PG/07/132/24256), for recruitment and genotyping of the GRAPHIC cohort. N.J.S. is an NIHR Senior Investigator and was supported by a British Heart Foundation Chair of Cardiology (grant number CH/03/001). This study is part of the research portfolio supported by the Leicester National Institute for Health Research Biomedical Research Unit in Cardiovascular Disease.

Global BPGen: The Global BPGen consortium comprises 17 GWAS studies: the Baltimore Longitudinal Study of Aging (BLSA), British 1958 Birth Cohort (B58C-T1DGC and B58C-WTCCC), Cohorte Lausannoise (CoLaus), Diabetes Genetics Initiative (DGI), European Prospective Investigation of Cancer-Norfolk-Genome Wide Association Study (EPIC-Norfolk-GWAS), Fenland Study, Finland-United States Investigation of NIDDM Genetics (FUSION) study, Invecchiare in Chianti (InCHIANTI), Kooperative Gesundheitsforschung in der Region Augsburg (KORA), the Myocardial Infarction Genetics Consortium (MIGen), Northern Finland Birth Cohort of 1966 (NFBC1966), SardiNIA, Study of Health in Pomerania (SHIP), the Precocious Coronary Artery Disease (PROCARDIS), Supplementation en Vitamines et Minéraux Antioxydants (SU.VI.MAX) and TwinsUK.

Lifelines: The LifeLines Cohort Study, and generation and management of GWAS genotype data for the LifeLines Cohort Study is supported by the Netherlands Organization of Scientific Research NWO (grant 175.010.2007.006), the Economic Structure Enhancing Fund (FES) of the Dutch government, the Ministry of Economic Affairs, the Ministry of Education, Culture and Science, the Ministry for Health, Welfare and Sports, the Northern Netherlands Collaboration of Provinces (SNN), the Province of Groningen, University Medical Center Groningen, the University of Groningen, Dutch Kidney Foundation and Dutch Diabetes Research Foundation. We thank Behrooz Alizadeh, Annemieke Boesjes, Marcel Bruinenberg, Noortje Festen, Lude Franke, Mitra Valimohammadi for their help in creating the GWAS database, and Rob Bieringa, Joost Keers, René Oostergo, Rosalie Visser for their work related to data-collection and validation. The authors are grateful to the study participants, the staff from the LifeLines Cohort Study and Medical Biobank Northern Netherlands, and the participating general practitioners and pharmacists. LifeLines Scientific Protocol Preparation: Rudolf de Boer, Melanie van der Klauw, Gerjan Navis, Hans Ormel, Dirkje Postma, Judith Rosmalen, Joris Slaets, Ronald Stolk, Bruce Wolffenbuttel; LifeLines GWAS Working Group: Behrooz Alizadeh, Marike Boezen, Marcel Bruinenberg, Noortje Festen, Lude Franke, Gerjan Navis, Dirkje Postma, Harold Snieder, Bruce Wolffenbuttel.

NESDA: The infrastructure for the NESDA study is funded through the Geestkracht programme of the Dutch Scientific Organization (ZON-MW, grant number 10-000-1002) and matching funds from participating universities and mental health care organizations. Genotyping in NESDA was funded by the Genetic Association Information Network (GAIN) of the Foundation for the US National Institutes of

Health. Statistical analyses were carried out on the Genetic Cluster Computer (<http://www.geneticcluster.org>), which is financially supported by the Netherlands Scientific Organization (NWO 480-05-003) along with a supplement from the Dutch Brain Foundation.

NORDIL: This work was supported by the British Heart Foundation (grant number CH/98001 to A.F.D., RG/07/005/23633 to A.F.D., S.P. and C.D.) and a Special Project, for genotyping of the Swedish extremes from the NORDIL and MDC cohorts; and by Pharmacia. We thank Professor Thomas Hedner (Department of Clinical Pharmacology, Sahlgrenska Academy, Gotheburg, Sweden) and Professor Sverre Kjeldsen (Ullevaal University Hospital, University of Oslo, Oslo, Norway), who are investigators of the NORDIL study. Professor Kjeldsen is also an investigator of the ASCOT trial.

PREVEND: PREVEND genetics is supported by the Dutch Kidney Foundation (Grant E033), the National Institutes of Health (grant LM010098), The Netherlands organisation for health research and development (NWO VENI grant 916.761.70), and the Dutch Inter University Cardiology Institute Netherlands (ICIN).

Procardis: This work was supported by the British Heart Foundation; by the European Community Sixth Framework Programme (grant number LSHM-CT-2007-037273); and by AstraZeneca. AB. R.C., M.F. is supported by the British Heart Foundation Centre for Research Excellence.

Rotterdam Study: The contributions of inhabitants, general practitioners and pharmacists of the Ommoord district to the Rotterdam Study are gratefully

acknowledged. The Rotterdam Study is supported by the Erasmus Medical Center Rotterdam, the Erasmus University Rotterdam, the Netherlands Organization for Scientific Research (NWO), the Netherlands Organization for Health Research and Development (ZonMW), the Research Institute for Diseases in the Elderly (RIDE), the Ministry of Education, Culture and Science, the Ministry of Health, Welfare and Sports, the European Commission (DG XII), and the Municipality of Rotterdam.

TRAILS: (Tracking Adolescents' Individual Lives Survey) is a collaborative project involving various departments of the University Medical Center and University of Groningen, the Erasmus University Medical Center Rotterdam, the University of Utrecht, the Radboud Medical Center Nijmegen, and the Parnassia Bavo group, all in the Netherlands. TRAILS has been financially supported by grants from the Netherlands Organization for Scientific Research NWO (Medical Research Council program grant GB-MW 940-38-011; ZonMW Brainpower grant 100-001-004; ZonMw Risk Behavior and Dependence grants 60-60600-98-018 and 60-60600-97-118; ZonMw Culture and Health grant 261-98-710; Social Sciences Council medium-sized investment grants GB-MaGW 480-01-006 and GB-MaGW 480-07-001; Social Sciences Council project grants GB-MaGW 457-03-018, GB-MaGW 452-04-314, and GB-MaGW 452-06-004; NWO large-sized investment grant 175.010.2003.005; NWO Longitudinal Survey and Panel Funding 481-08-013); the Sophia Foundation for Medical Research (projects 301 and 393), the Dutch Ministry of Justice (WODC), the European Science Foundation (EuroSTRESS project FP-006), and the participating universities. We are grateful to all adolescents, their parents and teachers who participated in this research and to everyone who worked on this project and made it possible. Statistical analyses were carried out on the Genetic Cluster Computer

(<http://www.geneticcluster.org>), which is financially supported by the Netherlands Scientific Organization (NWO 480-05-003) along with a supplement from the Dutch Brain Foundation.

WGHS: Women's Genome Health Study: The WGHS is funded by the Donald W. Reynolds Foundation (Las Vegas, NV), the Fondation LeDucq (Paris, France), the National Heart, Lung and Blood Institute (NHLBI; HL043851) and the National Cancer Institute (NCI; CA047988). Funding for genotyping and collaborative scientific support was provided by Amgen.

WHII: This work was supported by the British Heart Foundation (grant numbers PG/07/133/24260, RG/08/008, SP/07/007/23671), Senior Fellowship to A.D.H. (grant number FS/2005/125), Chair for S.E.H; by the National Heart Lung and Blood Institute (grant number HL36310) for M.Kivimaki's and M.Kumari's contributions to this work; by the Medical Research Council (grant number G0802432) Population Health Scientist Fellowship to M.V.H.; by the Health and Safety Executive; by the Department of Health; by the National Institute on Aging in the United States (grant number AG13196); by the Agency for Health Care Policy Research (grant number HS06516); by the John D. and Catherine T. MacArthur Foundation Research Networks on Successful Midlife Development and Socio-economic Status and Health.



Scientific Organization (NWO 480-05-003) along with a supplement from the Dutch Brain Foundation.

WGHS: Women's genome health study: The WGHS is funded by the Donald W. Reynolds Foundation (Las Vegas, NV), the Fondation LeDucq (Paris, France), the National Heart, Lung and Blood Institute (NHLBI; HL043851) and the National Cancer Institute (NCI; CA047988). Funding for genotyping and collaborative scientific support was provided by Amgen.

WHII: This work was supported by the British Heart Foundation (grant numbers PG/07/133/24260, RG/08/008, SP/07/007/23671), Senior Fellowship to A.D.H. (grant number FS/2005/125), Chair for S.E.H.; by the National Heart Lung and Blood Institute (grant number HL36310) for M.Kivimaki's and M.Kumari's contributions to this work; by the Medical Research Council (grant number G0802432) Population Health Scientist Fellowship to M.V.H.; by the Health and Safety Executive; by the Department of Health; by the National Institute on Aging in the United States (grant number AG13196); by the Agency for Health Care Policy Research (grant number HS06516); by the John D. and Catherine T. MacArthur Foundation Research Networks on Successful Midlife Development and Socio-economic Status and Health.

**Table S1: Clinical Characteristics of the IBC-array genotyped cohorts present in this study**

| Discovery Cohorts | Age           | Female/Male | SBP            | DBP           | MAP            | PP            | BMI                     | Taking anti-hypertensive medication |
|-------------------|---------------|-------------|----------------|---------------|----------------|---------------|-------------------------|-------------------------------------|
| AIBILI            | 52.8 ± 9.2    | 249/209     | 119.9 ± 13.7   | 75.4 ± 7.6    | 90.2 ± 8.8     | 44.5 ± 10.3   | 25.7 ± 3.6              | 0.0%                                |
| AMC-PAS           | 42.9 ± 5.3    | 180/563     | 128.6 ± 17.9   | 79.9 ± 10.7   | 96.1 ± 12.1    | 48.8 ± 13.1   | 26.9 ± 4.1              | 33.2%                               |
| Amish             | 47.6 ± 15.0   | 713/691     | 121.9 ± 16.5   | 75.3 ± 9.4    | 90.8 ± 10.8    | 46.6 ± 12.2   | 27.3 ± 5.0              | 16.4%                               |
| ARIC              | 54.2 ± 5.7    | 5124/4453   | 118.3 ± 17     | 71.5 ± 10     | 87.1 ± 11.3    | 46.7 ± 12.7   | 26.9 ± 4.9              | 25.1%                               |
| ASCOT             | 63 ± 8.1      | 224/1015    | 161.4 ± 17.8   | 92.9 ± 9.9    | 115.7 ± 10.6   | 68.5 ± 16.1   | 29.1 ± 4.6              | 89.2%                               |
| BHS               | 22.5 ± 4.4    | 291/228     | 111.5 ± 10.2   | 71.8 ± 8.5    | 85 ± 8.3       | 39.7 ± 8      | 24.7 ± 6.1              | 2.7%                                |
| BRIGHT (controls) | 58.7 ± 8.9    | 1088/647    | 123 ± 10.5     | 76.4 ± 7.2    | 91.9 ± 7.5     | 46.7 ± 8.3    | 25.3 ± 3.3              | 0.0%                                |
| BRIGHT (cases)    | 58 ± 10.3     | 1144/775    | 154.3 ± 21.1   | 93.9 ± 11.3   | 114 ± 13.3     | 60.4 ± 15.7   | 58 ± 10.3               | 92.5%                               |
| BWHHS             | 68.85 ± 5.51  | 337/30      | 146.53 ± 26.59 | 79.16 ± 12.85 | 102 ± 15       | 67.6 ± 19     | 27.25 ± 5.95            | 30.2%                               |
| CARDIA            | 40.6 ± 4.1    | 703/623     | 102.2 ± 30.5   | 71.9 ± 11.2   | 84.5 ± 11.4    | 37.7 ± 8.8    | 26.9 ± 6.4              | 3.7%                                |
| CCCS              | 64.2 ± 9.7    | 555/1402    | 136.94 ± 19.04 | 78.33 ± 10.61 | 156.48 ± 23.57 | 58.61 ± 15.69 | 29.2 ± 4.8/28.4 ± 6.5   | 88.7%                               |
| CFS               | 40.9 ± 19.9   | 302/252     | 121.1 ± 16.6   | 71.8 ± 11.7   | 88.2 ± 12.2    | 49.3 ± 12.4   | 30.1 ± 8.8              | 8.8%                                |
| CHS               | 72.6 ± 6.3    | 2208/1722   | 135.3 ± 21.5   | 69.9 ± 11.6   | 91.7 ± 12.9    | 65.4 ± 18.6   | 26.3 ± 4.8              | 39.7%                               |
| CLEAR             | 67.8 ± 9.6    | 0/1365      | 151.4 ± 22.4   | 82.2 ± 12.3   | 105.3 ± 13.8   | 69.2 ± 18.4   | 28.1 ± 5.0              | 67.0%                               |
| EHLRS-BOSS-BDES   | 58.1 ± 8.8    | 1965/1552   | 131.7 ± 20.9   | 78.8 ± 11.5   | 96.5 ± 13.6    | 52.9 ± 14.7   | 30.2 ± 5.9              | 32.98%                              |
| EPIC_NL           | 54.06 ± 10.11 | 4057/1137   | 133.13 ± 21.22 | 80.46 ± 10.93 | 97.98 ± 13.20  | 52.65 ± 15.68 | 26.77 ± 4.45            | N/A                                 |
| FHS               | 40.9 ± 9.1    | 3775/3134   | 118.6 ± 14.3   | 76.4 ± 9.8    | 90.5 ± 10.6    | 42.2 ± 9.4    | 26.1 ± 5                | 5.5%                                |
| GIRAFH            | 44.5 ± 11.7   | 882/812     | 134.9 ± 19.2   | 82.0 ± 10.5   | 99.7 ± 12.3    | 52.9 ± 14.4   | 25.1 ± 3.5              | 9.3%                                |
| GRAPHIC           | 39.30 ± 14.50 | 1004/1020   | 127.09 ± 17.84 | 79.12 ± 10.96 | 95.1 ± 12.5    | 48 ± 11.9     | 26.11 ± 4.61            | 6.7%                                |
| GQ2               | 65.5 ± 10.5   | 385/93      | 130.51 ± 22.40 | 72.71 ± 12.89 | 149.78 ± 27.66 | 57.81 ± 18.47 | 29.7 ± 7.7/29.5 ± 6.3   | 76.2%                               |
| INVEST            | 69.4 ± 9.5    | 467/580     | 160.8 ± 17.4   | 90.6 ± 10.1   | 114.0 ± 10.6   | 70.1 ± 15.9   | 29.0 ± 4.7/28.4 ± 6.2   | 82.6%                               |
| LURIC             | 58.1 ± 8.6    | 558/1480    | 151.2 ± 24.4   | 89.8 ± 12.1   | 110.3 ± 15.0   | 61.4 ± 17.6   | 27.7 ± 4.2              | 85.6%                               |
| MDC               | 57.8 ± 5.9    | 1074/772    | 115.6 ± 5.8    | 73.6 ± 5.3    | 87.6 ± 4.7     | 42 ± 6        | 24.3 ± 3.3              | 100.0%                              |
| MEDAL             | 62.9 ± 9.0    | 1178/2820   | 136.8 ± 16.0   | 81.7 ± 9.6    | 94.9 ± 8.6     | 52.9 ± 11.5   | 30.5 ± 6.3              | 1.4%                                |
| MESA              | 62.7 ± 10.3   | 1199/1097   | 123.5 ± 20.8   | 70.1 ± 10.2   | 87.9 ± 12.3    | 53.4 ± 16.7   | 27.8 ± 5.1              | 33.3%                               |
| MONICA/KORA F3    | 57.6 ± 8.1    | 755/649     | 131.8 ± 19.4   | 83.3 ± 10.3   | 99.5 ± 12.6    | 48.5 ± 13.2   | 27.8 ± 4.5              | 30.1%                               |
| MONICA/KORA S12   | 51.8 ± 9.9    | 431/549     | 133.6 ± 19.1   | 81.5 ± 11.1   | 98.8 ± 12.5    | 52.1 ± 14.6   | 27.2 ± 4.0              | 16.6%                               |
| NBS               | 41.36 ± 12.37 | 1183/1169   | N/A            | N/A           | N/A            | N/A           | N/A                     | N/A                                 |
| NORDIL            | 56 ± 4        | 979/940     | 177.3 ± 14.6   | 105.9 ± 5.5   | 129.7 ± 7.1    | 71.5 ± 13.9   | 28.3 ± 4.6              | 0.0% a                              |
| NSHS95            | 49.4 ± 18.4   | 857/899     | 126.6 ± 17.7   | 76.7 ± 11.6   | 93.3 ± 11.8    | 49.9 ± 15.8   | 27.1 ± 5.5              | N/A                                 |
| PEAR              | 50.1 ± 9.4    | 194/244     | 151.8 ± 12.4   | 98.0 ± 5.7    | 115.9 ± 6.9    | 53.7 ± 10.8   | [30.3 ± 4.4/30.4 ± 6.1] | 0%                                  |
| PennCAC           | 56.0 ± 8.0    | 631/1145    | 132 ± 23.2     | 72.4 ± 11.2   | 52.6 ± 12.6    | 59.5 ± 19.7   | 29.8 ± 5.9              | N/A                                 |
| PennCath          | 52.0 ± 9.0    | 739/1386    | 127 ± 15.1     | 76.7 ± 9.5    | 62.9 ± 10.5    | 51.9 ± 12.3   | 30.1 ± 5.9              | 32.8%                               |
| Procardis         | 59.34 ± 9.93  | 1634/1564   | 130.75 ± 17.11 | 79.63 ± 10.03 | 96.7 ± 11.2    | 51.1 ± 13.4   | 26.81 ± 4.37            | 19.3%                               |
| SMART             | 59.36 ± 12.25 | 206/299     | 158.64 ± 18.57 | 94.76 ± 11.80 | 116.06 ± 12.87 | 63.88 ± 13.78 | 27.35 ± 4.62            | 39.4%                               |
| WHI               | 68.0 ± 6.6    | 7606/0      | 133.0 ± 18.8   | 75.0 ± 9.7    | 94.3 ± 11.0    | 58.0 ± 16.2   | 28.3 ± 6.2              | 33.3%                               |
| WHII              | 60.83 ± 6.0   | 1845/3210   | 128.1 ± 16.7   | 74.6 ± 10.5   | 92.4 ± 11.8    | 53.5 ± 11.2   | 26.7 ± 4.3              | 22.8%                               |
| <b>Total</b>      |               | 49758/40496 |                |               |                |               |                         |                                     |

a No medication for two weeks prior to when BP was measured.

| Replication Cohorts                          | Age         | Female/Male  | SBP          | DBP         | MAP         | PP          | BMI        | Taking anti-hypertensive medication |
|----------------------------------------------|-------------|--------------|--------------|-------------|-------------|-------------|------------|-------------------------------------|
| <b>GBPG cohorts (Nature Genetics 2009) b</b> |             |              |              |             |             |             |            |                                     |
| BLSA                                         | 42.4 ± 13.2 | 311/397      | 119.5 ± 15.0 | 77.3 ± 10.2 | N/A         | N/A         | 24.5 ± 3.6 | 5.2%                                |
| B58C – T1DGC                                 | 44.3 ± 0.3  | 1315/1265    | 121.7 ± 15.3 | 79.4 ± 10.5 | N/A         | N/A         | 27.4 ± 4.9 | 4.7%                                |
| B58C – WTCCC                                 | 44.9 ± 0.4  | 736/737      | 126.7 ± 15.2 | 79.1 ± 10.2 | N/A         | N/A         | 27.4 ± 4.7 | 4.2%                                |
| CoLaus                                       | 51.7 ± 9.5  | 2634/2335    | 127.3 ± 17.4 | 79.4 ± 10.8 | N/A         | N/A         | 25.8 ± 4.6 | 16.0%                               |
| EPIC- Norfolk - GWAS                         | 57.2 ± 7.8  | 1134/966     | 136.7 ± 19.1 | 83.9 ± 11.9 | N/A         | N/A         | 26.3 ± 3.9 | 16.0%                               |
| Finland                                      | 45.0 ± 7.3  | 785/616      | 122.8 ± 16.3 | 75.5 ± 10.7 | N/A         | N/A         | 27.1 ± 4.9 | 5.5%                                |
| InCHIANTI                                    | 56.9 ± 14.5 | 309/253      | 138.4 ± 20.1 | 81.4 ± 10.1 | N/A         | N/A         | 27.1 ± 4.2 | 23.7%                               |
| KORA                                         | 52.5 ± 10.1 | 838/806      | 133.4 ± 18.5 | 81.8 ± 10.9 | N/A         | N/A         | 27.3 ± 4.1 | 17.0%                               |
| NFBC1966                                     |             | 31 2476/2285 | 125.2 ± 13.8 | 77.5 ± 11.7 | N/A         | N/A         | 24.6 ± 4.2 | 2.0%                                |
| SardINIA                                     | 40.8 ± 15.3 | 2279/1719    | 128.7 ± 28.4 | 79.7 ± 17.3 | N/A         | N/A         | 25.1 ± 4.6 | 10.0%                               |
| SHIP                                         | 45.0 ± 13.9 | 1754/1556    | 133.1 ± 20.2 | 83.5 ± 11.3 | N/A         | N/A         | 26.9 ± 4.7 | 16.3%                               |
| SUVIMAX                                      | 50.5 ± 6.2  | 1094/729     | 120.9 ± 12.3 | 78.0 ± 8.1  | N/A         | N/A         | 23.5 ± 3.3 | 0.0%                                |
| TwinsUK                                      | 45.8 ± 11.9 | 873/0        | 122.9 ± 15.4 | 78.2 ± 10.3 | N/A         | N/A         | 24.8 ± 4.6 | 22.0%                               |
| DGI controls                                 | 56.1 ± 8.7  | 651/626      | 133.3 ± 18.4 | 80.1 ± 10.0 | N/A         | N/A         | 26.7 ± 3.8 | 18.0%                               |
| FUSION NGT controls                          | 58.2 ± 10.7 | 509/529      | 139.4 ± 19.3 | 81.5 ± 10.3 | N/A         | N/A         | 27.1 ± 4.0 | 21.0%                               |
| MiGen controls                               | 48.9 ± 8.3  | 426/695      | 127.1 ± 17.8 | 80.2 ± 11.6 | N/A         | N/A         | 27.1 ± 5.2 | 13.4%                               |
| LIFELINES                                    | 47.3 ± 11.2 | 4640/3483    | 127.9 ± 15.7 | 75.1 ± 9.1  | 52.7 ± 11.8 | 92.7 ± 10.3 | 26.3 ± 4.3 | 15.5%                               |
| PREVEND                                      | 49.6 ± 12.5 | 1752/1869    | 129.1 ± 19.9 | 74.1 ± 9.9  | 54.9 ± 13.9 | 92.4 ± 12.5 | 26.1 ± 4.3 | 14.2%                               |
| WGHS                                         | 54.2 ± 7.1  | 22625/0      | 125.5 ± 16.4 | 78.0 ± 10.7 | 93.8 ± 11.9 | 47.6 ± 10.4 | 25.9 ± 5.0 | 12.9%                               |
| <b>Total</b>                                 |             | 47141/20866  |              |             |             |             |            |                                     |

DBP = diastolic blood pressure

SBP = systolic blood pressure

MAP = median arterial pressure

PP = pulse pressure

BMI = body mass index

Means±Standard deviation is given for each phenotype, except % where indicated.

MAP and PP demographics were not available for the GBPG cohorts.

Discovery cohorts : Allied Irish Bank Workers Study III (AIBILI); Academic Medical Center Amsterdam Premature Atherosclerosis Study (AMC-PAS); Atherosclerosis Risk in Communities (ARIC); Anglo-Scandinavian Cardiac Outcomes Trial (ASCOT); Bogalusa Heart Study (BHS); British Genetics of Hypertension (BRIGHT); British Women's Heart and Health Study (BWHHS); Coronary Artery Risk Development in Young Adults (CARDIA); Cleveland Clinic CHARISMA Study (CCCS); Cleveland Family Study (CFS); Cardiovascular Health Study (CHS); Carotid Lesion Epidemiology And Risk (CLEAR); European Prospective Investigation into Cancer and Nutrition in the Netherlands (EPIC-NL); Framingham Heart Study (FHS); Genetic Identification of Risk factors in Familial Hypercholesterolemia (GIRAFH); Genetic Regulation of Arterial Pressure of Humans in the Community (GRAPHIC); Heredity and Phenotype Intervention (HAPI) in the Amish; International Verapamil SR Trandolapril Study (INVEST); Ludwigshafen Risk and Cardiovascular Health Study (LURIC); Malmo Diet and Cancer (MDC) Study; Multinational Etoricoxib and Diclofenac Arthritis Long-term (MEDAL) program; Multi-Ethnic Study of Atherosclerosis (MESA); MONICA Cooperative Health Research in the Region of Augsburg Study (KORA (F3 and S12 subst)); Nordic Dilatation (NORDIL) Study; Pharmacogenomics Evaluation of Antihypertensive Responses (PEAR); University of Pennsylvania Coronary Artery Calcification Study (PennCAC); University of Pennsylvania Catheterization study program (PennCATH); Second Manifestations of ARterial disease SMART) and Women's Health Initiative (WHI); Whitehall II study (WHII). †Members of the NHLBI Candidate gene Association Resource (CARE).

b The Global BPgen (GBPG) consortium comprises 17 GWAS studies: the Baltimore Longitudinal Study of Aging (BLSA), British 1958 Birth Cohort (B58C-T1DGC and B58C-WTCCC), Cohorte Lausannoise (CoLaus), Diabetes Genetics Initiative (DGI), European Prospective Investigation of Cancer-Norfolk-Genome Wide Association Study (EPIC-Norfolk-GWAS), Finland Study, Finland-United States Investigation of NIDDM Genetics (FUSION) study, Invecchiare in Chianti (InCHIANTI), Kooperative Gesundheitsforschung in der Region Augsburg (KORA), the Myocardial Infarction Genetics Consortium (MiGen), Northern Finland Birth Cohort of 1966 (NFBC1966), SardINIA, Study of Health in Pomerania (SHIP), Supplementation en Vitamines et Minéraux Antioxydants (SU.VI.MAX) and TwinsUK. The PROCARDIS data submitted to GBPG was excluded as this study contributed to the discovery analyses.







**Table S4. eQTL supporting information on BP associated SNPs**

| Locus | IndexSNP  | eSNP       | r <sup>2</sup> (index to eSNP) | Tissue                        | Reference          | eSNP.p      | Chr | Pos (B36) | ArrayID          | Transcript | isCis? | Best eSNP/transcript | Best eSNP.p | Tissue                        | ‡ Best to BP eSNP | D'        |
|-------|-----------|------------|--------------------------------|-------------------------------|--------------------|-------------|-----|-----------|------------------|------------|--------|----------------------|-------------|-------------------------------|-------------------|-----------|
| 2     | rs2854275 | rs2187668  | 1                              | Monocytes                     |                    | 4.82E-95    | 6   | 32713862  |                  | HLA-DRB4   | Y      | rs2187668            | 4.82E-95    | Monocytes                     | Same              | Same      |
| 2     | rs2854275 | rs2187668  | 1                              | Blood                         | Fehrmann et al 20  | 3.20E-59    | 6   | 32713862  | 780403           | HLA-DRB1   | Y      | rs2187668            | 3.20E-59    | Blood(Fehrmann et al)         | Same              | Same      |
| 2     | rs2854275 | rs2187668  | 1                              | Liver                         | Schröder et al 201 | 1.31E-10    | 6   | 32713862  |                  | HLA-DRB4   | Y      | rs2187668            | 1.31E-10    | Liver(Schroder)               | Same              | Same      |
| 3     | rs2282978 | rs2282978  | IndexSNP                       | CR:Norm                       |                    | 0.00002616  | 7   | 92102346  | 10023821866      | CDK6       | Y      | Index SNP            | 0.00002616  | CR:Norm                       | Index SNP         | Index SNP |
| 4     | rs4746172 | rs10824069 | 1                              | Lung                          |                    | <2E-16      | 10  | 75532802  | 100300544_TGI_at | ADK        | Y      | rs10824069           | <2E-16      | Lung                          | Same              | Same      |
| 5     | rs217727  | rs217727   | IndexSNP                       | LCL (MuTHER)                  | Grundberg et al 2f | 2.40E-06    | 11  | 1973484   | ILMN_1830423     | AK126915   | Y      | Index SNP            | 2.40E-06    | LCL (MuTHER)                  | Same              | Same      |
| 5     | rs217727  | rs217727   | IndexSNP                       | Skin (MuTHER)                 | Grundberg et al 2f | 6.59E-06    | 11  | 1973484   | ILMN_1830423     | AK126915   | Y      | Index SNP            | 6.59E-06    | Skin (MuTHER)                 | Same              | Same      |
| 6     | rs757081  | rs757081   | IndexSNP                       | LCL in asthmatics (Liang 1kg) | Liang et 2013      | 1.56E-16    | 11  | 17308259  | 229838_at        | NUCB2      | Y      | rs214083             | 3.28E-45    | LCL in asthmatics (Liang 1kg) | 0.415             | 1         |
| 6     | rs757081  | rs757081   | IndexSNP                       | LCL (MuTHER)                  | Grundberg et al 2f | 3.10E-05    | 11  | 17308259  | ILMN_1799381     | SNORD14A   | Y      | rs1541533            | 6.17E-44    | LCL (MuTHER)                  | 0.034             | 1         |
| 7     | rs3741378 | rs2306365  | 0.898                          | Lymph                         |                    | 2.54E-15    | 11  | 65183922  | hmm1261-5        | PCNXL3     | Y      | rs2306365            | 2.54E-15    | Lymph                         | Same              | Same      |
| 7     | rs3741378 | rs11227247 | 0.92                           | VC:All                        |                    | 7.60E-11    | 11  | 65179429  | 10023850638      | MALAT1     | Y      | rs11227247           | 7.60E-11    | VC:All                        | Same              | Same      |
| 7     | rs3741378 | rs11227247 | 0.92                           | Omental Adipose               | Dobrin et al 2011  | 2.16E-08    | 11  | 65179429  | 10023850638      | MALAT1     | Y      | rs11227247           | 2.16E-08    | omental                       | Same              | Same      |
| 7     | rs3741378 | rs7101916  | 0.879                          | SubCutAdipose(Greenawalt)     | Greenawalt et al 2 | 4.70E-07    | 11  | 65187936  | 10023850638      | MALAT1     | Y      | rs7101916            | 4.70E-07    | SubCutAdipose(Greenawalt)     | Same              | Same      |
| 7     | rs3741378 | rs7101916  | 0.879                          | CR:All                        |                    | 7.47E-06    | 11  | 65187936  | 10023850638      | MALAT1     | Y      | rs7101916            | 7.47E-06    | CR:All                        | Same              | Same      |
| 7     | rs3741378 | rs11227247 | 0.92                           | Liver(UChicago)               |                    | 0.005228942 | 11  | 65179429  | A_23_P161624     | FOSL1      | Y      | rs11227247           | 0.00522894  | Liver(UChicago)               | Same              | Same      |
| 7     | rs3741378 | rs11227247 | 0.92                           | Lymph                         |                    | 1.61E-14    | 11  | 65179429  | hmm1261-5        | PCNXL3     | Y      | rs2306365            | 2.54E-15    | Lymph                         | 0.915             | 1         |
| 9     | rs33063   | rs33063    | IndexSNP                       | BcellsTransformed_HapMapJPT   |                    | 9.55E-08    | 16  | 68197718  | GI_40217627-5    | LOC283970  | Y      | rs9939092            | 4.74E-21    | BcellsTransformed_HapMapJPT   | Unknown           | Unknown   |

Fehrmann RS, Jansen RC, Veldink JH, Westra HJ, Arends D, Bonder MJ, et al. Trans-eQTLs reveal that independent genetic variants associated with a complex phenotype converge on intermediate genes, with a major role for the HLA. *PLoS Genet.* 2011 Aug;7(8):e1002197.

Schröder A, Klein K, Winter S, Schwab M, Bonin M, Zell A, Zanger UM. Genomics of ADME gene expression: mapping expression quantitative trait loci relevant for absorption, distribution, metabolism and excretion of drugs in human liver. *Pharmacogenomics J.* 2013 Feb;13(1):12-20.

Grundberg E, Small KS, Hedman AK, Nica AC, Buil A, Keildson S, et al. Mapping cis- and trans-regulatory effects across multiple tissues in twins. *Nat Genet.* 2012 Oct;44(10):1084-9.

Liang L, Morar N, Dixon AL, Lathrop GM, Abecasis GR, Moffatt MF, et al. A cross-platform analysis of 14,177 expression quantitative trait loci derived from lymphoblastoid cell lines. *Genome Res.* 2013 Apr;23(4):716-26

Dobrin R, Greenawalt DM, Hu G, Kemp DM, Kaplan LM, Schadt EE, Emilsson V. Dissecting cis regulation of gene expression in human metabolic tissues. *PLoS One.* 2011;6(8):e23480.

Greenawalt DM, Dobrin R, Chudin E, Hatoum U, Suver C, Beaulaurier J, Zhang B, Castro V, Zhu J, Sieberts SK, Wang S, Molony C, Heymsfield SB, Kemp DM, Reitman ML, Lum PY, Schadt EE, Kaplan LM. A survey of the genetics of stomach, liver, and adipose gene expression from a morbidly obese cohort. *Genome Res.* 2011 Jul;21(7):1008-16.









**Table S6. ENCODE supporting data on BP associated SNPs**

| Sentinel SNP | Chr | Genome position (hg19) | Highest scoring Proxy SNP | Combined functional score | r2 LD | D' LD | RegulomeDB $\zeta$ | Gene ID         | Entrez_ID  | Cardiovascular Disease (MESH) | Vascular Disease (MESH) | Hypertension (MESH) | Regulation of Blood Pressure (GO) | direct interactor with Hypertension MESH gene | MESH candidate | Functional Candidate (<4 score) | Literature Candidate | Druggable annotation     |
|--------------|-----|------------------------|---------------------------|---------------------------|-------|-------|--------------------|-----------------|------------|-------------------------------|-------------------------|---------------------|-----------------------------------|-----------------------------------------------|----------------|---------------------------------|----------------------|--------------------------|
| rs1682312    | 2   | 183210447              | rs864417                  |                           | 5     | 0.77  | 0.93               | Chromatin_Str   | PDE1A      | 5136                          | .                       | .                   | .                                 | .                                             | No             | No                              | Yes                  | Class 2: tools available |
| rs2854275    | 6   | 32623223               | rs9273327                 |                           | 1     | 0.59  | 0.77               | Single_Nucleo   | HLA-DQB1   | 3119                          | .                       | .                   | .                                 | .                                             | No             | Yes                             | Yes                  | Non-druggable            |
| rs2854275    | 6   | 32713862               | rs2854275                 | eQTL                      |       |       |                    |                 | HLA-DRB4   | 3126                          | .                       | .                   | .                                 | .                                             | No             | Yes                             | No                   | Non-druggable            |
| rs2282978    | 7   | 92264410               | rs2282978                 |                           | 2     | 1     | 1                  | Motifs PWM L    | CDK6       | 1021                          | .                       | y                   | .                                 | Y                                             | Yes            | Yes                             | Yes                  | Class 2:tools available  |
| rs1022400    | 7   | 151403260              | rs57807319                |                           | 2     | 0.77  | 0.91               | Motifs Footprir | PRKAG2     | 51422                         | .                       | .                   | .                                 | Y                                             | Yes            | Yes                             | Yes                  | Non-druggable            |
| rs4746172    | 10  | 75853796               | rs10824069                |                           | 5     | 0.98  | 1                  | Motifs PWM P    | VCL        | 7414                          | .                       | .                   | .                                 | Y                                             | Yes            | No                              | Yes                  | Class 4 :predicted dru   |
| rs4746172    | 10  | 75883129               | rs201890718               |                           | 3     | 0.92  | 0.96               | Motifs PWM R    | AP3M1      | 26985                         | .                       | .                   | .                                 | Y                                             | Yes            | Yes                             | No                   | Non-druggable            |
| rs4746172    | 10  | 75911680               | rs3812639                 |                           | 2     | 0.5   | 0.96               | Motifs PWM F    | ADK        | 132                           | .                       | .                   | .                                 | Y                                             | Yes            | Yes                             | No                   | Class 2:tools available  |
| rs217727     | 11  | 1973484                | rs217727                  | eQTL                      |       |       |                    |                 | AK126915   |                               | .                       | .                   | .                                 | .                                             | No             | Yes                             | No                   | Non-druggable            |
| rs217727     | 11  | 2002472                | rs10840140                |                           | 4     | 0.7   | 0.93               | Motifs Footprir | MRPL23     | 6150                          | .                       | .                   | .                                 | .                                             | No             | No                              | No                   | Non-druggable            |
| rs217727     | 11  | 2011205                | rs11564745                |                           | 2     | 0.52  | 0.83               | Motifs PWM Z    | MRPL23-AS1 | 1E+08                         | .                       | .                   | .                                 | .                                             | No             | Yes                             | No                   | Non-druggable            |
| rs217727     | 11  | 2021980                | rs2525883                 |                           | 2     | 0.79  | 0.91               | Motifs Footprir | H19        | 283120                        | .                       | .                   | .                                 | Y                                             | Yes            | Yes                             | Yes                  | Non-druggable            |
| rs757081     | 11  | 17230850               | rs140613036               |                           | 2     | 0.5   | 0.74               | Motifs PWM C    | PIK3C2A    | 5286                          | .                       | .                   | .                                 | .                                             | No             | Yes                             | No                   | Class 3:Gene Related     |
| rs757081     | 11  | 17260918               | rs10832750                |                           | 1     | 0.52  | 0.83               | Single_Nucleo   | NUCB2      | 4925                          | .                       | .                   | .                                 | Y                                             | Yes            | Yes                             | Yes                  | Class 4 :predicted dru   |
| rs757081     | 11  | 17308259               | rs757081                  | eQTL                      |       |       |                    |                 | SNORD14A   | 26822                         | .                       | .                   | .                                 | .                                             | No             | Yes                             | No                   | Non-druggable            |
| rs757081     | 11  | 17375260               | rs10535629                |                           | 2     | 0.57  | -0.87              | Motifs Footprir | NCR3LG1    | 374383                        | .                       | .                   | .                                 | .                                             | No             | Yes                             | No                   | Class 4 :predicted dru   |
| rs757081     | 11  | 17405617               | rs1002226                 |                           | 4     | 0.52  | -0.81              | Chromatin_Str   | KCNJ11     | 3767                          | Y                       | .                   | Y                                 | .                                             | Yes            | No                              | Yes                  | Class 1:Drug on Mark     |
| rs3741378    | 11  | 65380124               | rs1078457                 |                           | 4     | 0.52  | 0.93               | Chromatin_Str   | MAP3K11    | 4296                          | .                       | .                   | .                                 | Y                                             | Yes            | No                              | No                   | Class 2:tools available  |
| rs3741378    | 11  | 65384727               | rs12790427                |                           | 2     | 0.56  | 0.99               | Motifs PWM L    | PCNXL3     | 399909                        | .                       | .                   | .                                 | .                                             | No             | Yes                             | No                   | Class 4 :predicted dru   |
| rs3741378    | 11  | 65408937               | rs3741378                 |                           | 1     | 1     | 1                  | Chromatin_Str   | SIPA1      | 6494                          | .                       | .                   | .                                 | .                                             | No             | Yes                             | No                   | Non-druggable            |
| rs3741378    | 11  | 65422591               | rs7119750                 |                           | 4     | 0.9   | 0.97               | Chromatin_Str   | RELA       | 5970                          | .                       | .                   | .                                 | Y                                             | No             | No                              | Yes                  | Class 2:tools available  |
| rs3741378    | 11  | 65484719               | rs2236683                 |                           | 4     | 0.79  | 0.93               | Chromatin_Str   | KAT5       | 10524                         | .                       | .                   | .                                 | Y                                             | Yes            | No                              | No                   | Class 2:tools available  |
| rs3741378    | 11  | 65499692               | rs12361032                |                           | 6     | 0.61  | 0.81               | Motifs PWM P    | RNASEH2C   | 84153                         | .                       | .                   | .                                 | .                                             | No             | No                              | No                   | Non-druggable            |
| rs3741378    | 11  | 65549506               | rs61895678                |                           | 5     | 0.51  | 0.73               | Motifs PWM A    | AP5B1      | 91056                         | .                       | .                   | .                                 | .                                             | No             | No                              | No                   | Non-druggable            |
| rs7297416    | 12  | 54417576               | rs736825                  |                           | 3     | 0.6   | 0.91               | Motifs PWM K    | HOXC5      | 3222                          | .                       | .                   | .                                 | Y                                             | Yes            | Yes                             | No                   | Non-druggable            |
| rs7297416    | 12  | 54424123               | rs7308105                 |                           | 2     | 0.52  | 0.82               | Motifs PWM Z    | HOXC6      | 3223                          | .                       | .                   | .                                 | Y                                             | Yes            | Yes                             | No                   | Non-druggable            |
| rs7297416    | 12  | 54445215               | rs199718335               |                           | 2     | 0.79  | 0.95               | Motifs PWM R    | HOXC4      | 3221                          | .                       | .                   | .                                 | Y                                             | Yes            | Yes                             | No                   | Non-druggable            |
| rs1036477    | 15  | 48793615               | rs77360718                |                           | 2     | 0.77  | 0.94               | Motifs Footprir | FBN1       | 2200                          | Y                       | Y                   | .                                 | Y                                             | Yes            | Yes                             | Yes                  | Non-druggable            |
| rs33063      | 16  | 68197718               | rs33063                   | eQTL                      |       |       |                    |                 | LOC283970  |                               | .                       | .                   | .                                 | .                                             | No             | Yes                             | No                   | Non-druggable            |
| rs33063      | 16  | 69548788               | rs7200764                 |                           | 7     | 0.7   | 0.86               | No data         | CYB5B      | 80777                         | .                       | .                   | .                                 | .                                             | No             | No                              | No                   | Non-druggable            |
| rs33063      | 16  | 69590366               | rs1549287                 |                           | 1     | 0.87  | 0.94               | Single_Nucleo   | NFAT5      | 10725                         | .                       | .                   | .                                 | Y                                             | Yes            | Yes                             | Yes                  | Non-druggable            |
| rs33063      | 16  | 69742387               | rs56125990                |                           | 6     | 0.82  | -0.9               | Motifs PWM N    | NQO1       | 1728                          | .                       | .                   | .                                 | Y                                             | Yes            | No                              | Yes                  | Class 1:Drug on Mark     |
| rs33063      | 16  | 69775500               | rs17299478                |                           | 1     | 0.71  | -0.86              | Single_Nucleo   | NOB1       | 28987                         | .                       | .                   | .                                 | .                                             | No             | Yes                             | No                   | Non-druggable            |
| rs33063      | 16  | 69795323               | rs56140069                |                           | 6     | 0.59  | -0.82              | Motifs PWM M    | WWP2       | 11060                         | .                       | .                   | .                                 | .                                             | No             | No                              | Yes                  | Non-druggable            |
